# Supplementary material for: Three-dimensional low-defect carbon nanotube/nitrogen-doped graphene hybrid aerogel-supported Pt nanoparticles as efficient electrocatalysts toward the methanol oxidation reaction
Source: Royal Society of Chemistry journal article supplement (doi:10.1039/c8ta05124k), 2018-01-01
Supplement: c8ta05124k1.pdf [file c8ta05124k1.pdf]

## Supporting Information for

### Three-dimensional low-defect carbon nanotube/nitrogen-doped graphene hybrid aerogel-supported Pt nanoparticles as efficient electrocatalysts toward methanol oxidation reaction

Minmin Yan<sup>a</sup>, Quanguo Jiang<sup>a</sup>, Tao Zhang<sup>a</sup>, Jiayu Wang<sup>b</sup>, Lu Yang<sup>a</sup>, Zhiyong Lu<sup>a</sup>,  
Haiyan He<sup>a</sup>, Yongsheng Fu<sup>b</sup>, Xin Wang<sup>b</sup>, and Huajie Huang<sup>a,\*</sup>

<sup>a</sup>College of Mechanics and Materials, Hohai University, Nanjing 210098, China

<sup>b</sup>Key Laboratory of Soft Chemistry and Functional Materials, Nanjing University of Science and Technology, Ministry of Education, Nanjing 210094, China

\*Corresponding author. E-mail address: huanghuajie@hhu.edu.cn

#### Supplementary Results

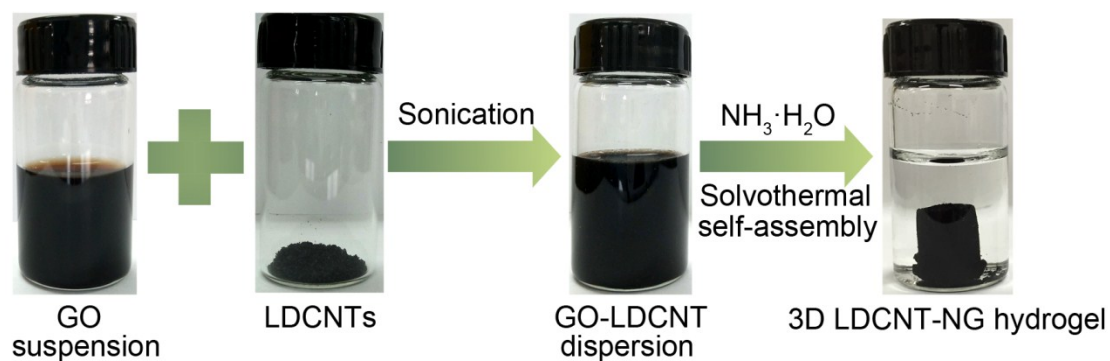

**Fig. S1** The synthetic process for 3D LDCNT-NG hydrogel. It includes: (1) dispersion of low-defect CNTs in GO suspension via ultrasonic treatment; (2) formation of 3D LDCNT-NG hydrogel through a solvothermal reaction.

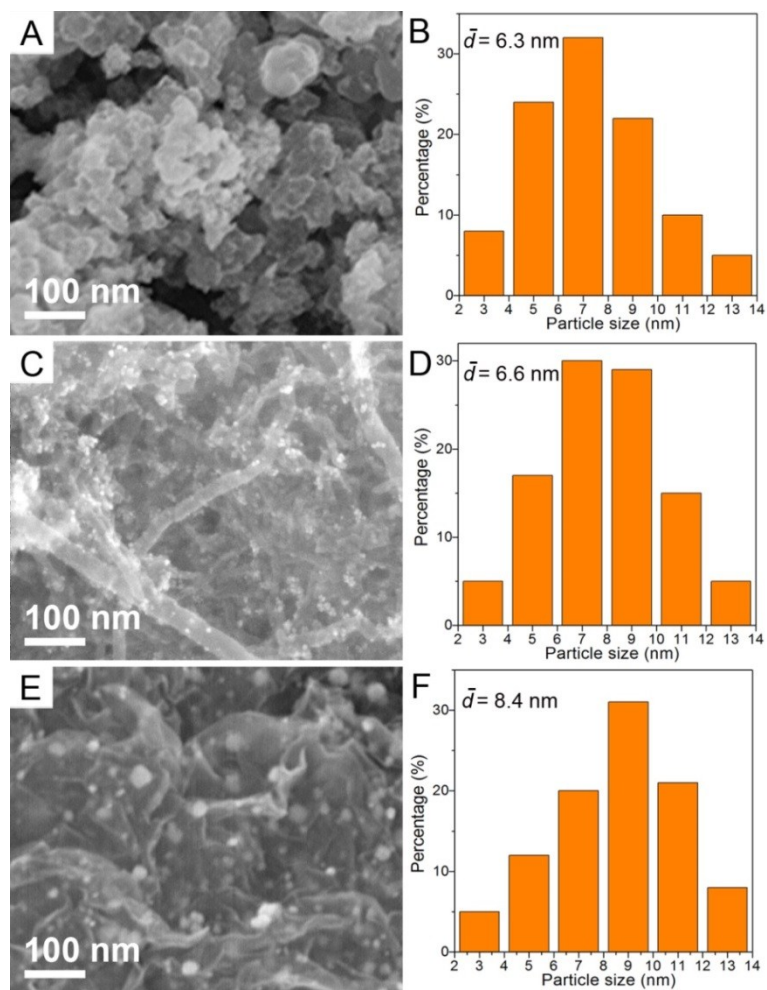

**Fig. S2** Representative FE-SEM images and Pt particle size distribution of (A and B) Pt/C, (C and D) Pt/CNT, and (E and F) Pt/G, respectively.

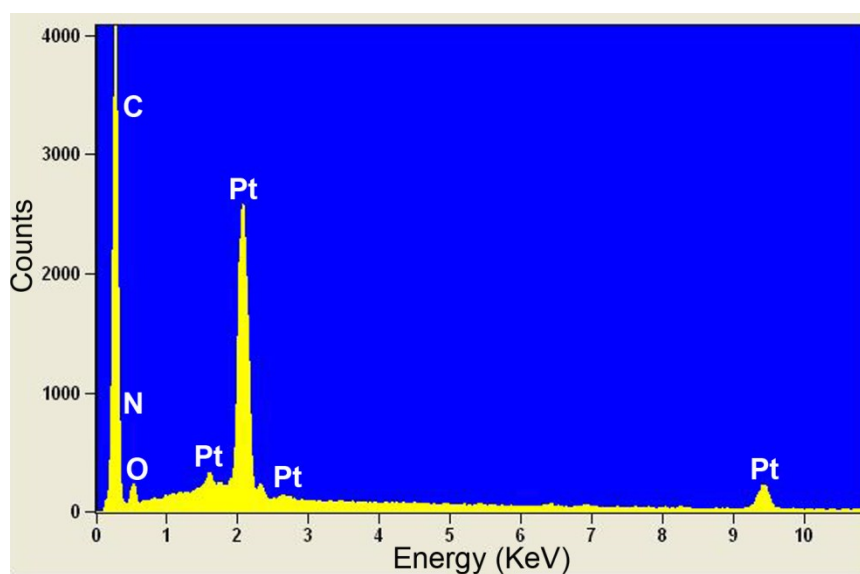

**Fig. S3** EDX spectrum of the Pt/LDCNT-NG architecture.

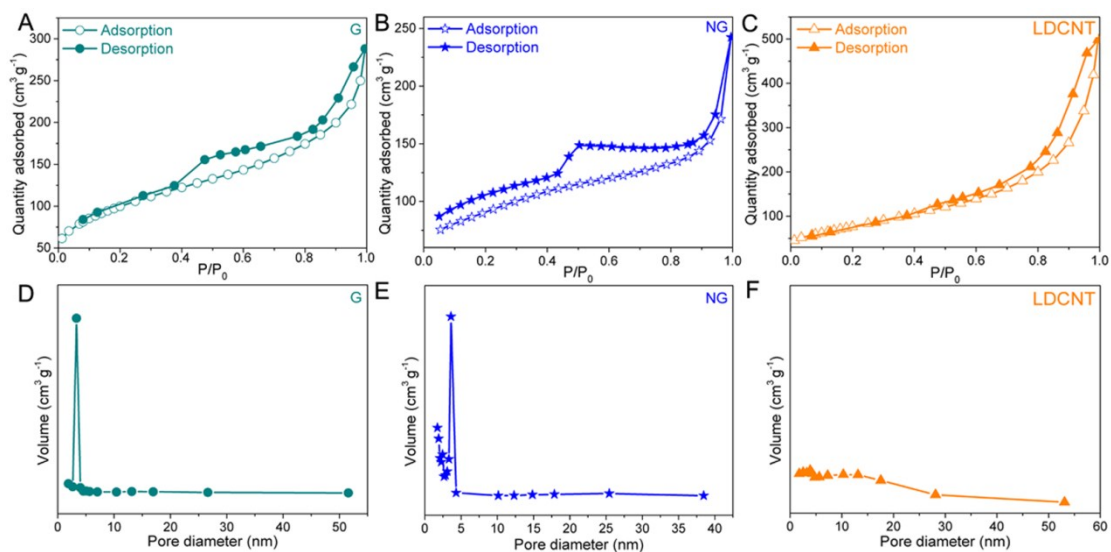

**Fig. S4** Nitrogen adsorption–desorption isotherms and pore size distributions of (A and D) G, (B and E) NG, and (C and F) LDCNT samples, respectively.

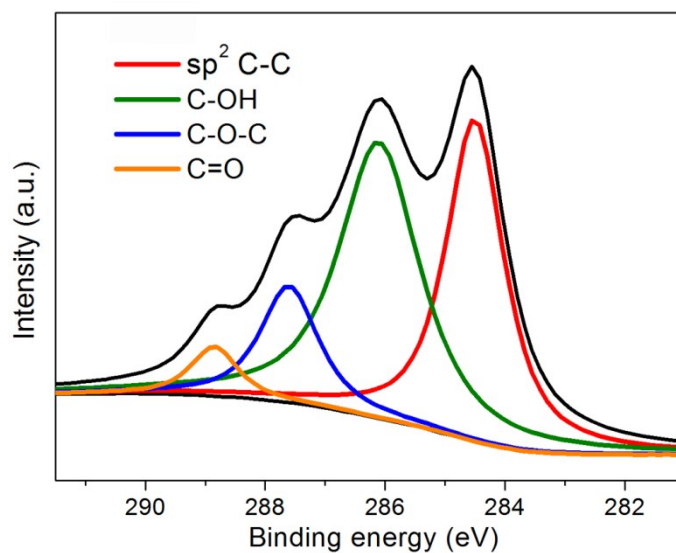

**Fig. S5** C 1s core-level XPS spectrum of GO.

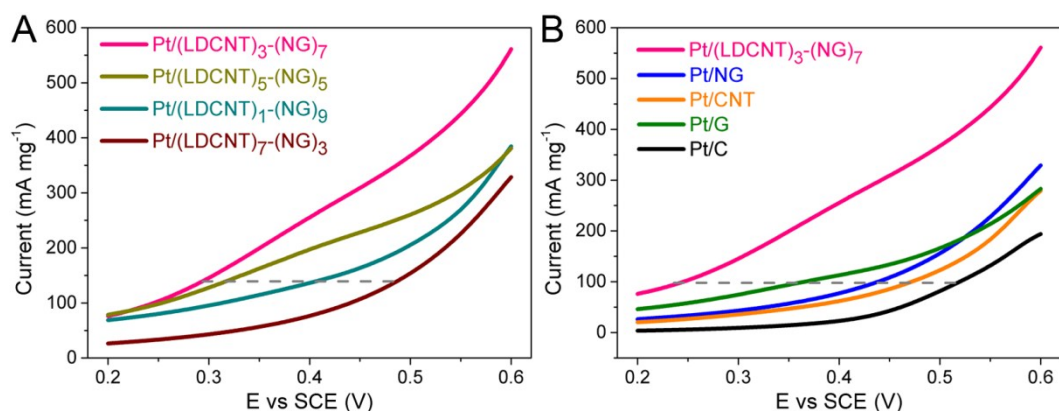

**Fig. S6** Linear sweep voltammets of (A) the Pt/LDCNT-NG architectures with varying LDCNT/NG ratios, and (B) Pt/(LDCNT)<sub>3</sub>-(NG)<sub>7</sub>, Pt/NG, Pt/CNT, Pt/G and Pt/C in 0.5 M H<sub>2</sub>SO<sub>4</sub> solution at 50 mV s<sup>-1</sup>.

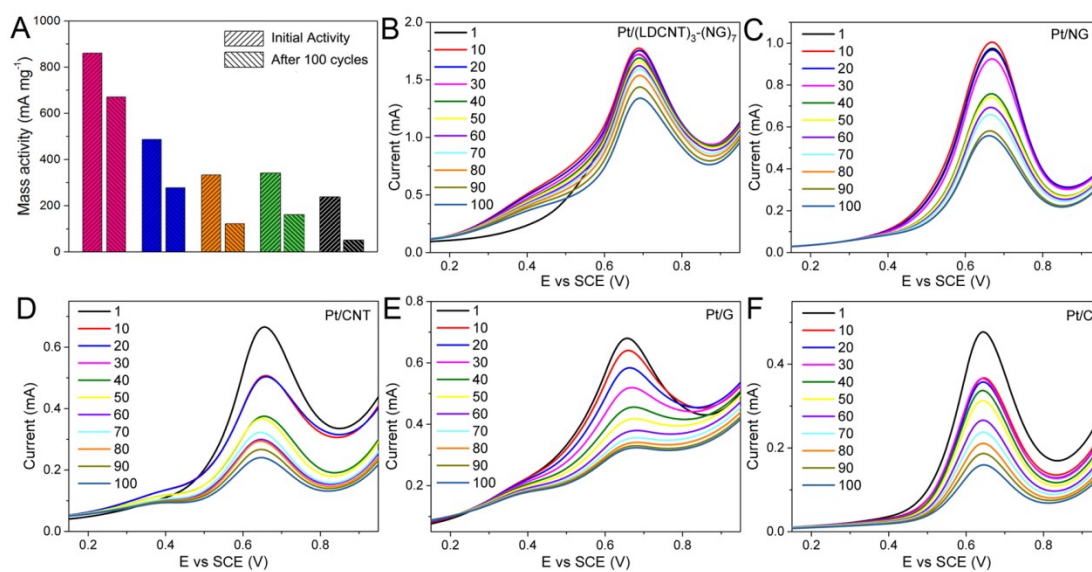

**Fig. S7** (A) The mass activities of different catalysts before and after 100 cycles. 100 consecutive cycle scans of methanol oxidation obtained from (B) Pt/(LDCNT)<sub>3</sub>-(NG)<sub>7</sub>, (C) Pt/NG, (D) Pt/CNT, (E) Pt/G and (F) Pt/C.

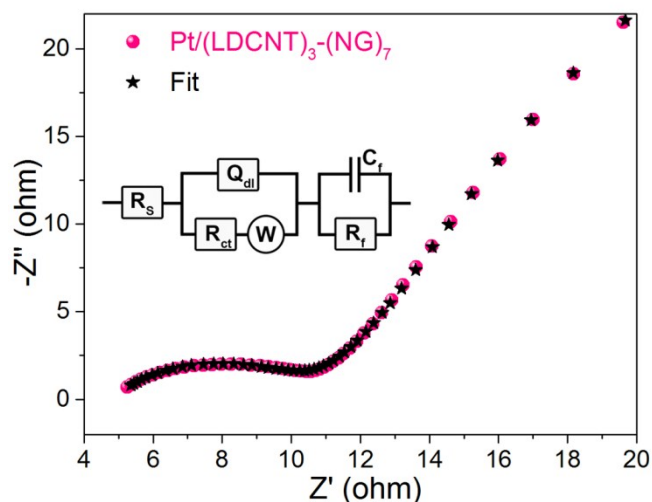

**Fig. S8** Nyquist plots of Pt/(LDCNT)<sub>3</sub>-(NG)<sub>7</sub> electrode and the corresponding fitting curve. The inset is the equivalent circuit.

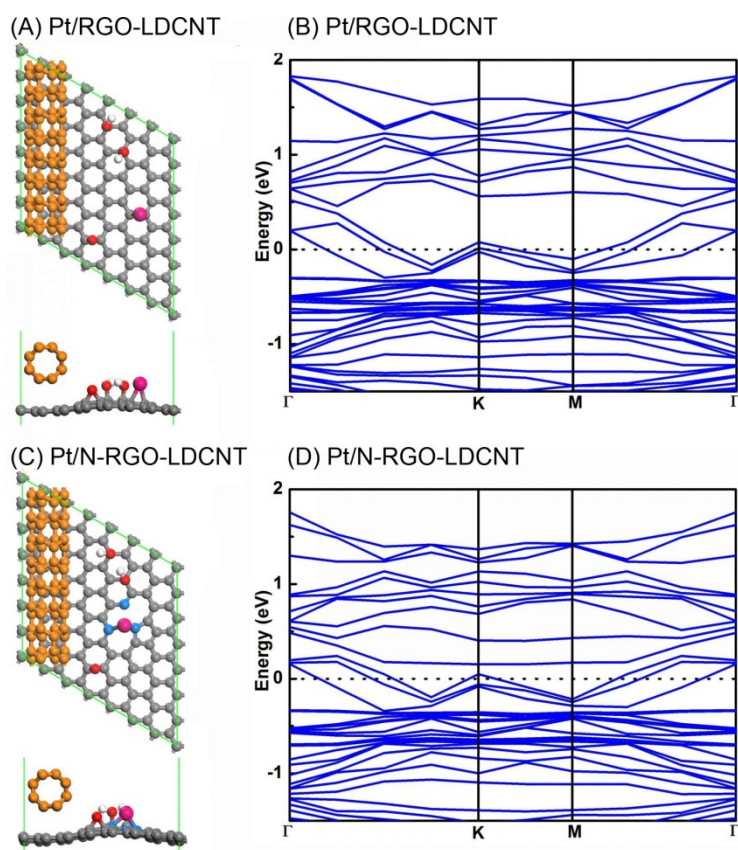

**Fig. S9** The relaxed atomic structure of (A) Pt/RGO-LDCNT, and (B) the corresponding band structure. The relaxed atomic structure of (C) Pt/N-RGO-LDCNT, and (D) the corresponding band structure.

**Table S1.** Comparison of methanol oxidation activity for the 3D Pt/(LDCNT)<sub>3</sub>-(NG)<sub>7</sub> hybrid and recent state-of-the-art Pt-based catalysts.

| Catalyst                                          | ECSA<br>(m <sup>2</sup> g <sup>-1</sup> ) | Mass activity<br>(mA mg <sup>-1</sup> ) | Scan rate<br>(mV s <sup>-1</sup> ) | Electrolyte                                                        | Reference |
|---------------------------------------------------|-------------------------------------------|-----------------------------------------|------------------------------------|--------------------------------------------------------------------|-----------|
| 3D Pt/(LDCNT) <sub>3</sub> -(NG) <sub>7</sub>     | 132.4                                     | 871.9                                   | 50                                 | 0.5 M H <sub>2</sub> SO <sub>4</sub> +<br>1 M CH <sub>3</sub> OH   | This work |
| Pt/[BMIM]BF <sub>4</sub> /<br>CNT                 | N.A.                                      | 155.0                                   | 50                                 | 0.5 M H <sub>2</sub> SO <sub>4</sub> +<br>1 M CH <sub>3</sub> OH   | 1         |
| Pt/ionic liquid/<br>CNT                           | 67.6                                      | ~410.0                                  | 50                                 | 0.5 M H <sub>2</sub> SO <sub>4</sub> +<br>0.5 M CH <sub>3</sub> OH | 2         |
| Pt/low-defect<br>graphene                         | 63.0                                      | 203.8                                   | 20                                 | 1 M H <sub>2</sub> SO <sub>4</sub> +<br>2 M CH <sub>3</sub> OH     | 3         |
| Pt/graphene                                       | 101.3                                     | 333.3                                   | 50                                 | 0.5 M H <sub>2</sub> SO <sub>4</sub> +<br>0.5 M CH <sub>3</sub> OH | 4         |
| Pt/exfoliated<br>graphene                         | 51.0                                      | ~300.0                                  | 50                                 | 0.5 M H <sub>2</sub> SO <sub>4</sub> +<br>2 M CH <sub>3</sub> OH   | 5         |
| Pt/CNT/graphene                                   | 95.6                                      | 617.9                                   | 20                                 | 1 M H <sub>2</sub> SO <sub>4</sub> +<br>2 M CH <sub>3</sub> OH     | 6         |
| Pt/N-doped<br>graphene                            | N.A.                                      | ~400.0                                  | 200                                | 0.5 M H <sub>2</sub> SO <sub>4</sub> +<br>1 M CH <sub>3</sub> OH   | 7         |
| Pt/N-doped<br>graphene ribbon                     | 64.6                                      | ~390.0                                  | 20                                 | 1 M H <sub>2</sub> SO <sub>4</sub> +<br>2 M CH <sub>3</sub> OH     | 8         |
| PtAu/N-doped<br>graphene                          | 60.9                                      | 417.0                                   | 50                                 | 0.5 M H <sub>2</sub> SO <sub>4</sub> +<br>0.5 M CH <sub>3</sub> OH | 9         |
| Pt/B-doped<br>graphene                            | 58.8                                      | ~410.0                                  | 50                                 | 0.5 M H <sub>2</sub> SO <sub>4</sub> +<br>0.5 M CH <sub>3</sub> OH | 10        |
| PtRu/N-doped<br>CNT-graphene                      | N.A.                                      | 500.5                                   | 10                                 | 0.5 M H <sub>2</sub> SO <sub>4</sub> +<br>1 M CH <sub>3</sub> OH   | 11        |
| 3D Pt/C <sub>3</sub> N <sub>4</sub> /<br>graphene | 69.0                                      | 612.8                                   | 20                                 | 1 M H <sub>2</sub> SO <sub>4</sub> +<br>2 M CH <sub>3</sub> OH     | 12        |
| Pt/mesoporous<br>carbon                           | N.A.                                      | ~450.0                                  | 20                                 | 0.5 M H <sub>2</sub> SO <sub>4</sub> +<br>1 M CH <sub>3</sub> OH   | 13        |
| Pt/macroporous<br>carbon                          | N.A.                                      | 81.6                                    | 50                                 | 0.5 M H <sub>2</sub> SO <sub>4</sub> +<br>0.5 M CH <sub>3</sub> OH | 14        |
| Pt/N-doped<br>porous carbon                       | 24.6                                      | 343.0                                   | 50                                 | 0.5 M H <sub>2</sub> SO <sub>4</sub> +<br>1 M CH <sub>3</sub> OH   | 15        |
| 3D Pt/RuO <sub>2</sub> /<br>graphene              | 122.7                                     | 646.5                                   | 20                                 | 1 M H <sub>2</sub> SO <sub>4</sub> +<br>2 M CH <sub>3</sub> OH     | 16        |
| AuPtCu<br>nanowires                               | N.A.                                      | ~500.0                                  | 50                                 | 0.1 M HClO <sub>4</sub> +<br>1 M CH <sub>3</sub> OH                | 17        |

|                             |       |       |    |                                                                  |    |
|-----------------------------|-------|-------|----|------------------------------------------------------------------|----|
| FePtPd nanowires            | N.A.  | 488.7 | 50 | 0.1 M HClO <sub>4</sub> +<br>0.2 M CH <sub>3</sub> OH            | 18 |
| PtPd dendrites              | N.A.  | 490.0 | 50 | 0.5 M H <sub>2</sub> SO <sub>4</sub> +<br>1 M CH <sub>3</sub> OH | 19 |
| PtPd dendrites/<br>graphene | 81.6  | 647.2 | 50 | 0.5 M H <sub>2</sub> SO <sub>4</sub> +<br>1 M CH <sub>3</sub> OH | 20 |
| PtAu dendrites/<br>graphene | 100.8 | 365.0 | 50 | 0.5 M H <sub>2</sub> SO <sub>4</sub> +<br>1 M CH <sub>3</sub> OH | 21 |

**Table S2.** The charge-transfer resistance ( $R_{ct}$ ) for different catalysts.

| Electrode                                  | $R_{ct}$            |           |
|--------------------------------------------|---------------------|-----------|
|                                            | Value (ohm)         | Error (%) |
| Pt/(LDCNT) <sub>3</sub> -(NG) <sub>7</sub> | 5.3                 | 1.9       |
| Pt/CNT                                     | 22.5                | 6.1       |
| Pt/G                                       | 9.6                 | 9.1       |
| Pt/C                                       | 1.6×10 <sup>3</sup> | 4.8       |

#### Reference

- (1) H. Chu, Y. Shen, L. Lin, X. Qin, G. Feng, Z. Lin, J. Wang, H. Liu and Y. Li, *Adv. Funct. Mater.*, 2010, **20**, 3747-3752.
- (2) S. Guo, S. Dong and E. Wang, *Adv. Mater.*, 2010, **22**, 1269-1272.
- (3) H. Huang, H. Chen, D. Sun and X. Wang, *J. Power Sources*, 2012, **204**, 46-52.
- (4) S. Wu, J. Liu, Z. Tian, Y. Cai, Y. Ye, Q. Yuan and C. Liang, *ACS Appl. Mater. Interfaces*, 2015, **7**, 22935-22940.
- (5) S. M. Choi, H. S. Min, H. J. Kim and W. B. Kim, *Carbon*, 2011, **49**, 904-909.
- (6) X. Zhang, J. Zhang, H. Huang, Q. Jiang and Y. Wu, *Electrochim. Acta*, 2017, **258**, 919-926.
- (7) B. Xiong, Y. Zhou, Y. Zhao, J. Wang, X. Chen, R. O'Hayre and Z. Shao, *Carbon*, 2013,

- 52**, 181-192.
- (8) H. Huang, G. Ye, S. Yang, H. Fei, C. S. Tiwary, Y. Gong, R. Vajtai, J. M. Tour, X. Wang and P. M. Ajayan, *J. Mater. Chem. A*, 2015, **3**, 19696-19701.
- (9) G. Yang, Y. Li, R. K. Rana and J. J. Zhu, *J. Mater. Chem. A*, 2013, **1**, 1754-1762.
- (10) Y. Sun, C. Du, M. An, L. Du, Q. Tan, C. Liu, Y. Gao and G. Yin, *J. Power Sources*, 2015, **300**, 245-253.
- (11) R. Lv, T. Cui, M. S. Jun, Q. Zhang, A. Cao, D. S. Su, Z. Zhang, S. H. Yoon, J. Miyawaki and I. Mochida, *Adv. Funct. Mater.*, 2015, **21**, 999-1006.
- (12) H. Huang, S. Yang, R. Vajtai, X. Wang and P. M. Ajayan, *Adv. Mater.*, 2014, **26**, 5160-5165.
- (13) H. Jiang, T. Zhao, C. Li and J. Ma, *Chem. Commun.*, 2011, **47**, 8590-8592.
- (14) X. Bo and L. Guo, *Electrochim. Acta*, 2013, **90**, 283-290.
- (15) F. Su, Z. Tian, C. K. Poh, Z. Wang, S. H. Lim, Z. Liu and J. Lin, *Chem. Mater.*, 2010, **22**, 832-839.
- (16) H. Huang, J. Zhu, D. Li, C. Shen, M. Li, X. Zhang, Q. Jiang, J. Zhang and Y. Wu, *J. Mater. Chem. A*, 2017, **5**, 4560-4567.
- (17) W. Hong, J. Wang and E. Wang, *Small*, 2014, **10**, 3262-3265.
- (18) S. Guo, S. Zhang, X. Sun and S. Sun, *J. Am. Chem. Soc.*, 2011, **133**, 15354-15357.
- (19) L. Wang, Y. Nemoto and Y. Yamauchi, *J. Am. Chem. Soc.*, 2011, **133**, 9674-9677.
- (20) S. Guo, S. Dong and E. Wang, *Acs Nano*, 2010, **4**, 547-555.
- (21) W. Yuan, X. Fan, Z. Cui, T. Chen, Z. L. Dong, C. Li, W. Yuan, X. Fan, Z. Cui and T. Chen, *J. Mater. Chem. A*, 2016, **4**, 7352-7364.
